# Supplementary material
Source: PubMed Central journal article supplement (PMC6989949)
Supplement: BPH-177-372-s001.pdf [file BPH-177-372-s001.pdf]

**Supplemental Table 1. Serum biochemical parameters of CCl<sub>4</sub>-treated mice**

|                     | Control<br>(n = 8) | CCl <sub>4</sub> -corn oil<br>(n = 8) | CCl <sub>4</sub> -COS<br>(n = 8) |
|---------------------|--------------------|---------------------------------------|----------------------------------|
| ALT (U/L)           | 24.13 ± 3.23       | 63.13 ± 14.67 <sup>#</sup>            | 55.13 ± 19.61                    |
| AST (U/L)           | 111.00 ± 18.64     | 118.13 ± 27.77                        | 101.25 ± 14.83                   |
| ALP (U/L)           | 87.63 ± 18.74      | 72.50 ± 16.22                         | 72.25 ± 17.15                    |
| CHO (mmol/L)        | 3.04 ± 0.24        | 2.80 ± 0.36                           | 2.99 ± 0.48                      |
| HDL-C (mmol/L)      | 2.14 ± 0.19        | 1.71 ± 0.28 <sup>#</sup>              | 1.93 ± 0.34                      |
| LDL-C (mmol/L)      | 0.18 ± 0.03        | 0.27 ± 0.02 <sup>#</sup>              | 0.22 ± 0.06*                     |
| TG (mmol/L)         | 1.42 ± 0.40        | 1.96 ± 0.41 <sup>#</sup>              | 1.78 ± 0.25                      |
| serum TBA (μmol/L)  | 0.40 ± 0.61        | 4.24 ± 3.14 <sup>#</sup>              | 3.44 ± 2.71                      |
| serum TBiL (μmol/L) | 0.84 ± 0.32        | 1.13 ± 0.58                           | 1.29 ± 0.75                      |

Values are presented as the mean ± SD (n = 8 animals per group).

<sup>#</sup>P < 0.05, significantly different from the Control group

\*P < 0.05, significantly different from the CCl<sub>4</sub>-corn oil group; ANOVA followed by Tukey's test.

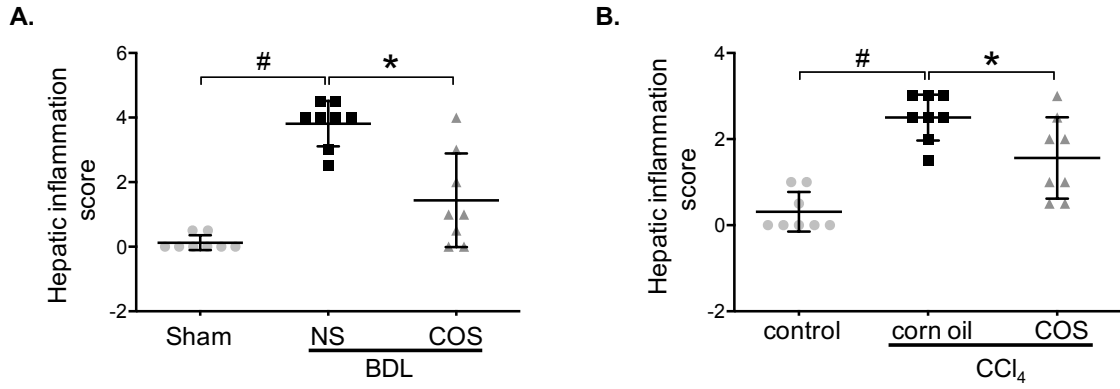

**Supplemental Figure 1**

Blinded quantitative assessment of hepatic inflammation in BDL-challenged rats and CCl<sub>4</sub>-challenged mice. The values are expressed as the mean ± SD (n = 8 of each group), #P < 0.05; significantly different from sham/control group, \*P < 0.05; significantly different from BDL-NS/CCl<sub>4</sub>-corn oil group; ANOVA followed by Tukey's test.

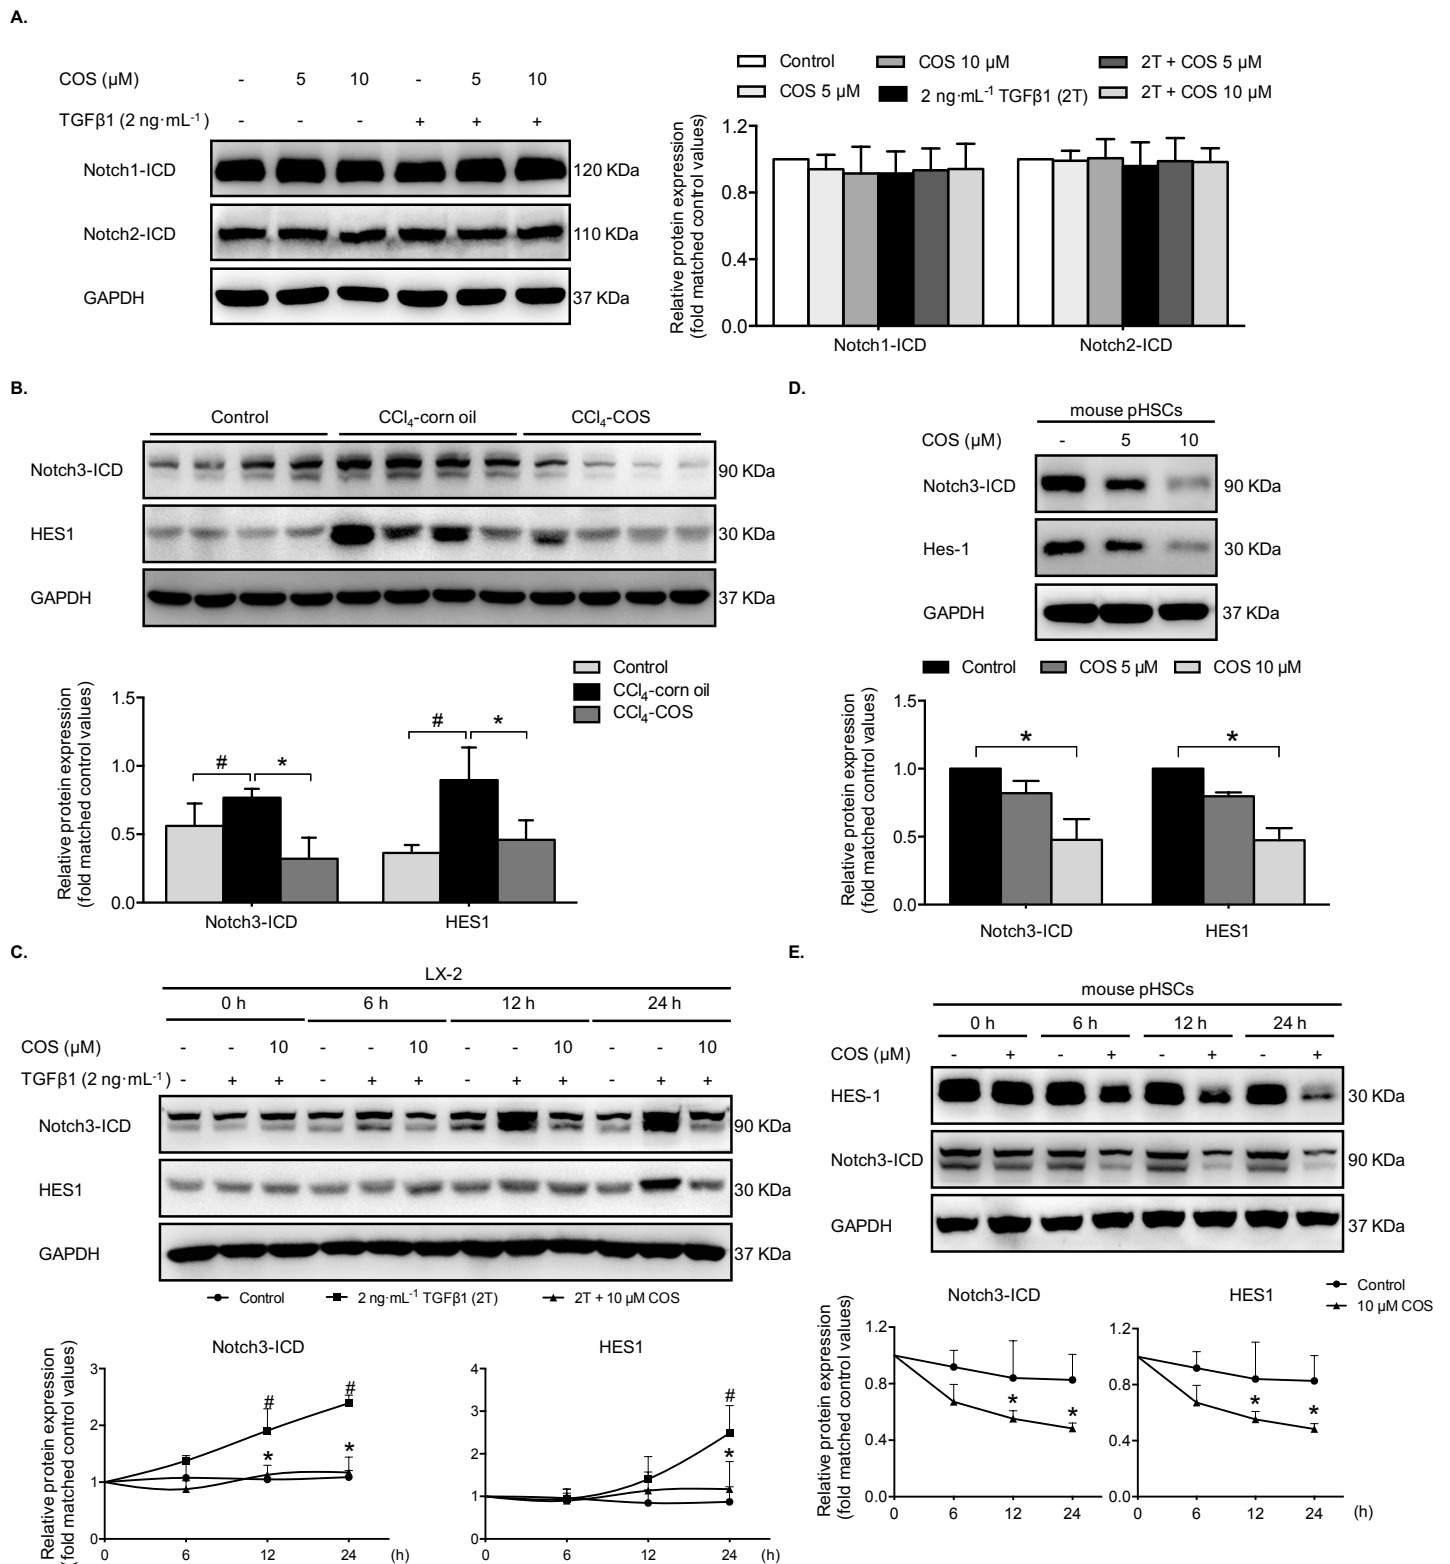

**Supplemental Figure 2**

(A) Western blot analysis of Notch1 and Notch2 expressions in LX-2 cells. (B) COS intervention inhibited the protein expressions of Notch3 and HES1 in CCl<sub>4</sub> mice livers. (C) COS time-dependently repressed Notch3 and HES1 protein

expressions in LX-2 cells. (D) and (E) The protein expressions of Notch3 and HES1 were significantly down-regulated in a dose- and time- dependent manner in mouse pHSCs. GAPDH served as a loading control. The values are expressed as the mean  $\pm$  SD of five independent assays, <sup>#</sup>P < 0.05; significantly different from the control group (B and C), \*P < 0.05; significantly different from the CCl<sub>4</sub>-corn oil group (B) and TGF $\beta$ 1 treatment group in LX-2 cells (C) and the control group in mouse pHSCs (D and E); ANOVA followed by Tukey's test.

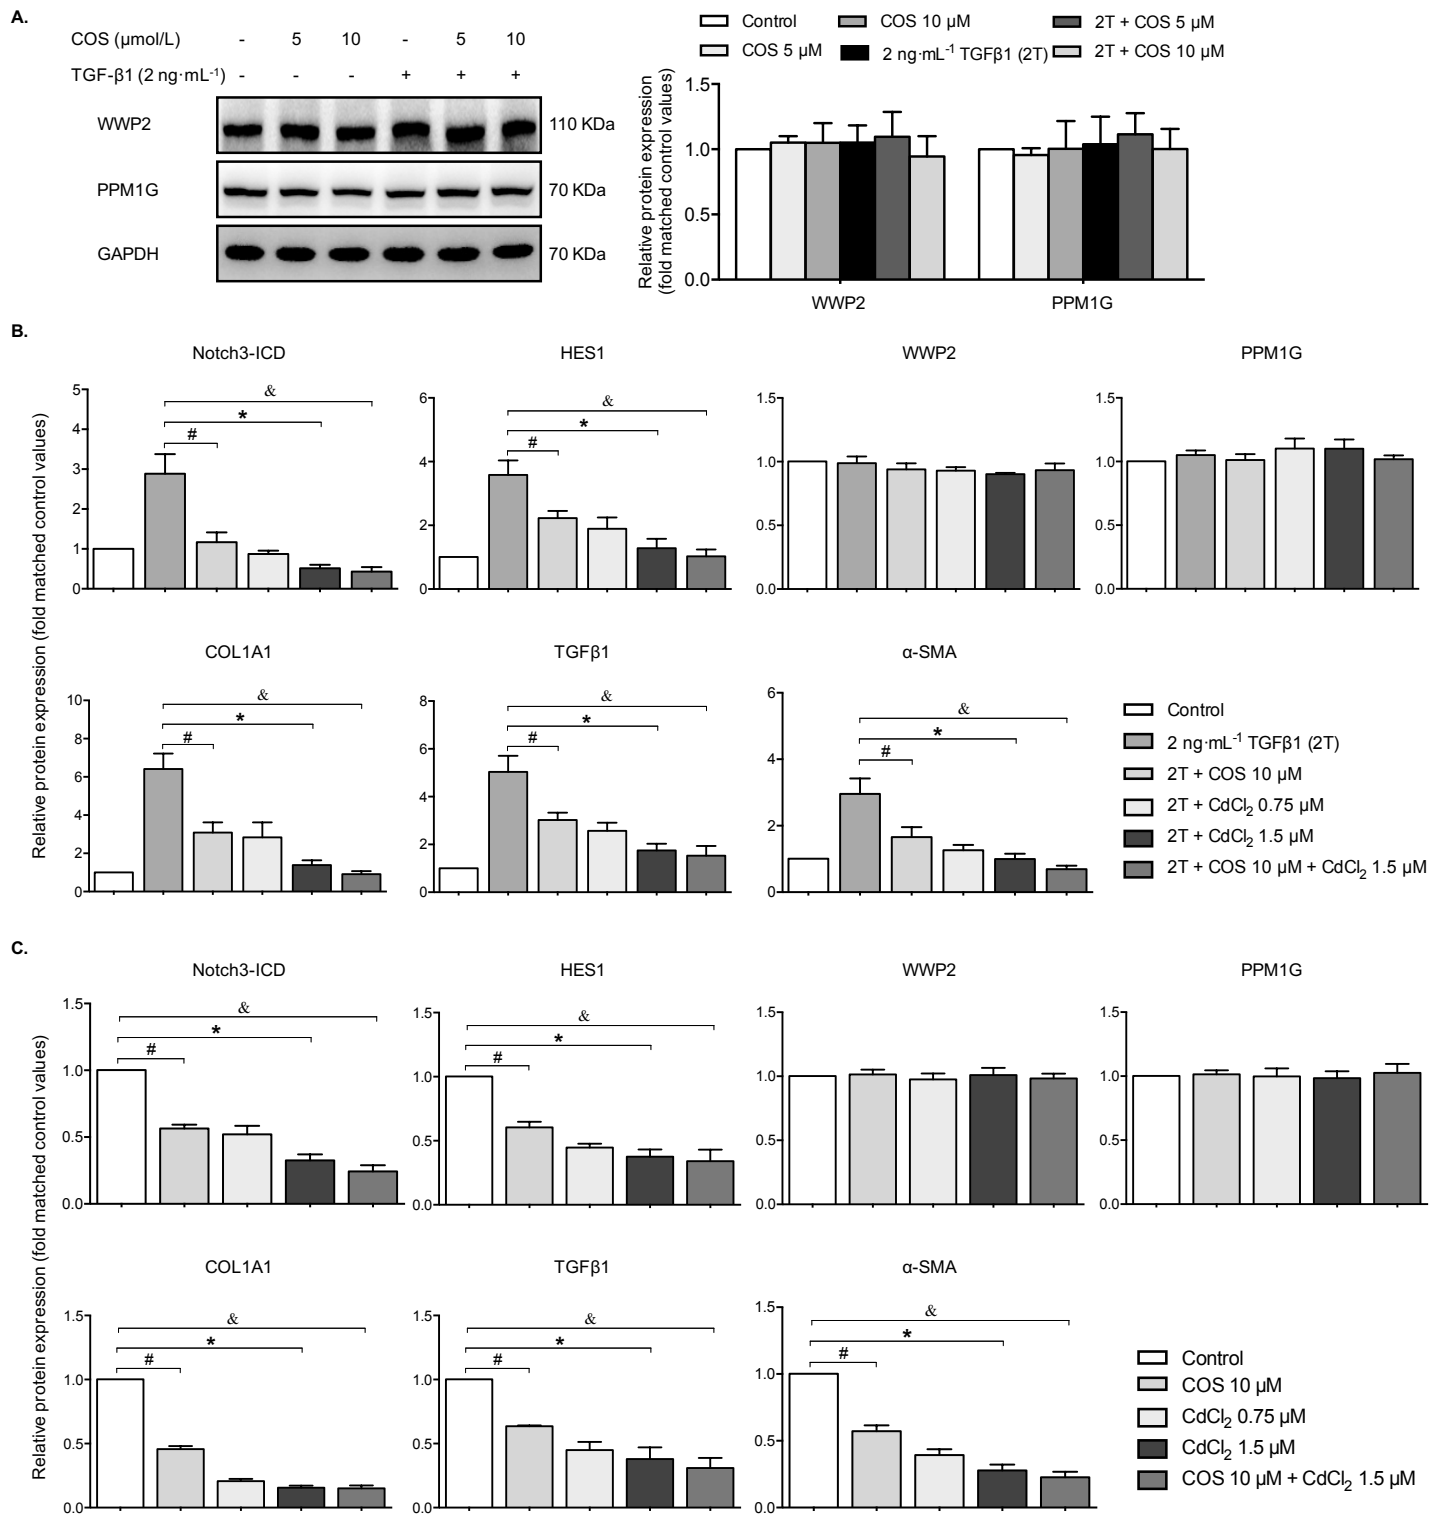

### Supplemental Figure 3

(A) Western blot analysis of PPM1G and WWP2 expressions in LX-2 cells. (B) LX-2 cells were treated with  $2 \text{ ng}\cdot\text{mL}^{-1}$  TGF- $\beta$ 1 with or without  $10 \mu\text{M}$  COS and/or  $\text{CdCl}_2$  ( $0.75$  or  $1.5 \mu\text{M}$ ) for 24 h after no FBS starvation. The protein expressions of WWP2, PPM1G, NICD3, HES1, and liver fibrosis markers were determined by immunoblotting with the indicated antibodies.

(C) mouse pHSCs were treated with 10  $\mu\text{M}$  COS and/or  $\text{CdCl}_2$  (0.75 or 1.5  $\mu\text{M}$ ). The same protein expressions were detected by western blot with the indicated antibodies. GAPDH was used as a loading control for all western blot assays. The data are expressed as the mean  $\pm$  SD of five independent assays. <sup>#</sup>P < 0.05; significantly different from the 2T + COS 10  $\mu\text{M}$  group; \*P < 0.05; significantly different from the 2T +  $\text{CdCl}_2$  1.5  $\mu\text{M}$  group; <sup>&</sup>P < 0.05; significantly different from the 2T + COS 10  $\mu\text{M}$  +  $\text{CdCl}_2$  1.5  $\mu\text{M}$  group in LX-2 cells. <sup>#</sup>P < 0.05; significantly different from the COS 10  $\mu\text{M}$  group; \*P < 0.05; significantly different from the  $\text{CdCl}_2$  1.5  $\mu\text{M}$  group; <sup>&</sup>P < 0.05; significantly different from the COS 10  $\mu\text{M}$  +  $\text{CdCl}_2$  1.5  $\mu\text{M}$  group in mouse pHSCs. ANOVA followed by Tukey's test.

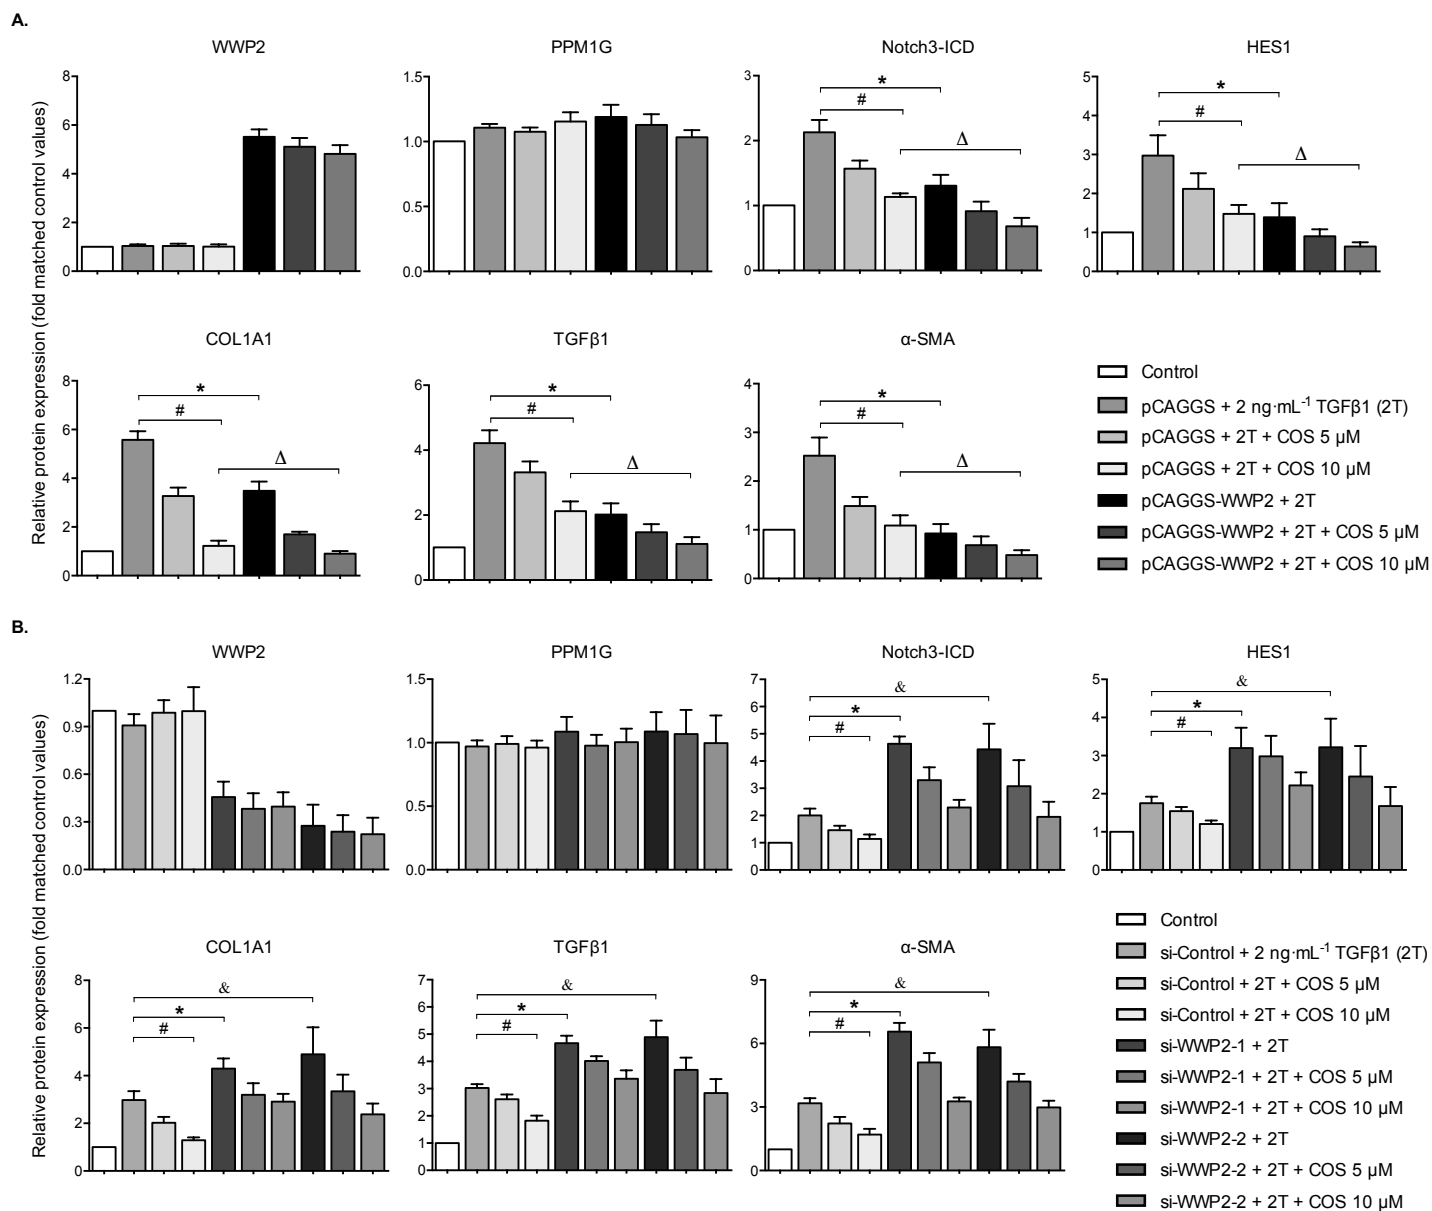

### Supplemental Figure 4

(A) LX-2 cells were transfected with 2.5 μg pCAGGS-WWP2 or vector and subsequently treated with 2 ng·mL<sup>-1</sup> TGF-β1 with or without COS (5 or 10 μM) for 24 h after no FBS starvation. The protein expressions of WWP2, PPM1G, NICD3, HES1, and liver fibrosis markers were determined by immunoblotting with the indicated antibodies. (B) LX-2 cells were transfected with 50 nM si-WWP2-1/2 or si-Control and subsequently treated with 2 ng·mL<sup>-1</sup> TGF-β1 with or without COS (5 or 10 μM) for 24 h after no FBS starvation. The same protein expressions were detected by western blot with the indicated antibodies. GAPDH was used as a loading control for all western blot assays. The data are expressed as the mean ± SD of five independent assays. #P < 0.05; significantly different from the pcDNA3.1/si-control + COS 10 μM group; \*P < 0.05; significantly different from the pCAGGS-WWP2/si-WWP2-1 + 2T group; &P < 0.05; significantly different from the si-WWP2-

2 + 2T group; <sup>Δ</sup>P < 0.05; significantly different from the pCAGGS-WWP2 + 2T + COS 10 μM group. ANOVA followed by Tukey's test.
